# Supplementary material for: Electrochemical Detection of Dopamine Using 3D Porous Graphene Oxide/Gold Nanoparticle Composites
Source: Preprints.org preprint supplement (doi:10.20944/preprints201704.0036.v1), 2017-04-06
Supplement: Supplementary file 1 [file supplementary]

## Supplementary figures and figure captions

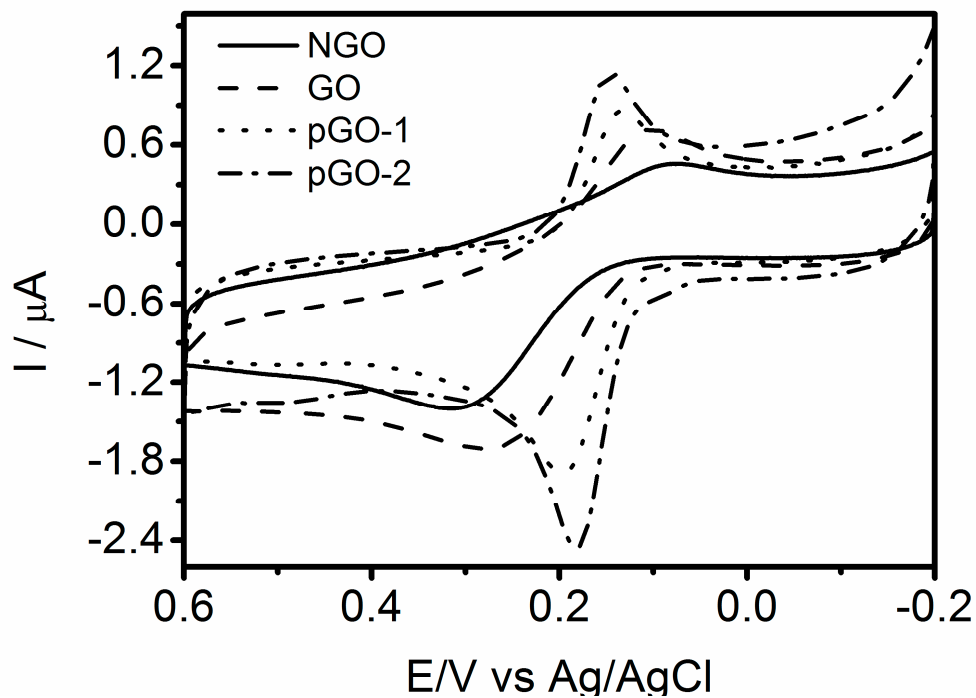

**Figure S1.** Cyclic voltammetric curves obtained from four different substrates in the presence of 10  $\mu\text{M}$  dopamine using DPBS (pH 7.4) as an electrolyte. Scan rate = 0.05 V/s. 'NGO', 'GO', 'pGO-1' and 'pGO-2' stand for 'commercial nano graphene oxide', 'graphene oxide', 'porous graphene oxide synthesized by 6 hours of ultrasonication' and 'porous graphene oxide synthesized by 12 hours of ultrasonication'.
